# Supplementary material for: Rationally designing a Ti3C2Tx/CNTs-Co9S8 heterostructure as a sulfur host with multi-functionality for high-performance lithium–sulfur batteries
Source: Royal Society of Chemistry journal article supplement (doi:10.1039/d2nr04526e), 2022-01-01
Supplement: d2nr04526e1.pdf [file d2nr04526e1.pdf]

## Supporting Information

### **Rationally designing a $\text{Ti}_3\text{C}_2\text{T}_x/\text{CNTs-Co}_9\text{S}_8$ heterostructure as sulfur host with multi-functionality for high-performance lithium-sulfur batteries**

Tuo Xiao,<sup>1</sup> Youfang Zhang,<sup>2, 3</sup> Wen Xi,<sup>1</sup> Rui Wang,<sup>1</sup> Yansheng Gong,<sup>1</sup> Beibei He,<sup>1</sup> Huanwen Wang,<sup>1</sup> Jun Jin<sup>1, 4\*</sup>

<sup>1</sup>*Faculty of Materials Science and Chemistry, China University of Geosciences, Wuhan 430074, China, E-mail: jinjun@cug.edu.cn;*

<sup>2</sup>*School of Materials Science and Engineering, Hubei University, Wuhan 430062, China;*

<sup>3</sup>*Ministry of Education Key Laboratory for Green Preparation and Application of Functional Materials, Hubei University, Wuhan 430062, China;*

<sup>4</sup>*Shenzhen Research Institute, China University of Geosciences, Shenzhen 518000, China.*

## 1. Characterizations

The samples' morphology and structure are analyzed using a scanning electron microscope (SEM, HITACHI SU 3500) and transmission electron microscope (TEM, Talos F200X). The element distribution of the samples is characterized by energy-dispersive X-ray spectroscopy (EDX) attached to TEM. The crystal structures of the samples are analyzed by X-ray diffraction (XRD, AXS D8 ADVANCE). The chemical compositions of the samples are characterized by X-ray photoelectron spectroscopy (XPS, K-ALPHA). The nitrogen adsorption-desorption isotherms are performed on the N<sub>2</sub> adsorption-desorption instrument (ASAP 2460, Micrometrics) to characterize the pore structures of the samples. The sulfur contents in the sulfur composite cathodes are determined by thermogravimetric analysis (TGA, STA449F3).

## 2. Electrochemical Measurements

The active material (*e.g.*, Ti<sub>3</sub>C<sub>2</sub>T<sub>x</sub>/CNTs-Co<sub>9</sub>S<sub>8</sub>/S), CNTs conductive additive, and PVDF binder are mixed with a mass ratio of 7:2:1 and dispersed in N-methyl pyrrolidone (NMP) solvent to obtain the electrode slurry. Then the slurry is uniformly coated on the aluminum foil using a scraper and then vacuum dried at 60 °C for 12 h to obtain the working electrode. The sulfur mass loading of the electrode is 0.8 or 2.5 mg cm<sup>-2</sup>. The coin cells (CR 2032) are assembled in an Ar-filled glovebox by using lithium foil as an anode, Celgard 2400 polypropylene membrane as a separator, and 1.0 M LiTFSI in DOL (1,3-dioxolane) and DME (dimethoxyethane) (1:1 vol%) with 1.0 wt% LiNO<sub>3</sub> additive as electrolyte. The added electrolyte to sulfur ratio is 20 μL mg<sup>-1</sup> in the cells. The galvanostatic charge-discharge test is conducted between 1.5 and 2.8 V on the LAND CT2001A test system. The CV curves are tested by the Chenhua CHI760E electrochemical workstation. Electrochemical impedance spectra (EIS) are performed on the electrochemical workstation (GAMRY REFERENCE 3000).

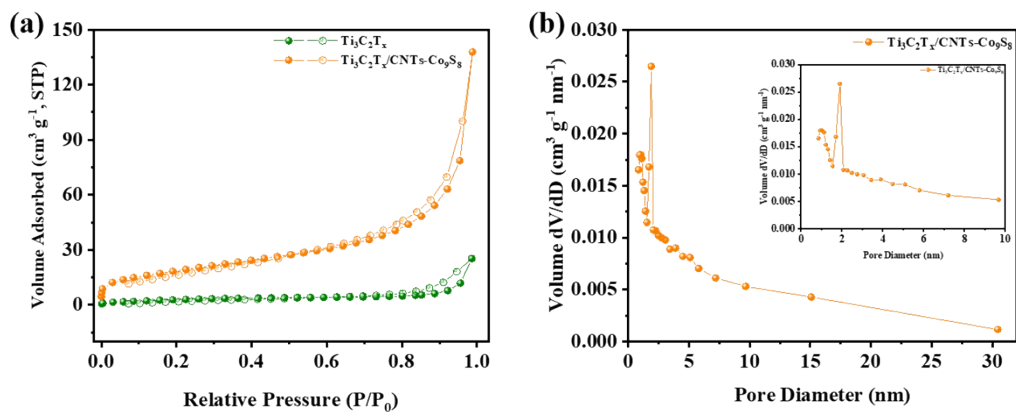

**Figure S1.** (a) N<sub>2</sub> adsorption-desorption isotherms of the 3D porous Ti<sub>3</sub>C<sub>2</sub>T<sub>x</sub>/CNTs-Co<sub>9</sub>S<sub>8</sub> and Ti<sub>3</sub>C<sub>2</sub>T<sub>x</sub> MXene. (b) BJH pore size distributions of the 3D porous Ti<sub>3</sub>C<sub>2</sub>T<sub>x</sub>/CNTs-Co<sub>9</sub>S<sub>8</sub>, the inset figure shows the specific distributions of pore size in the range of 0-10 nm.

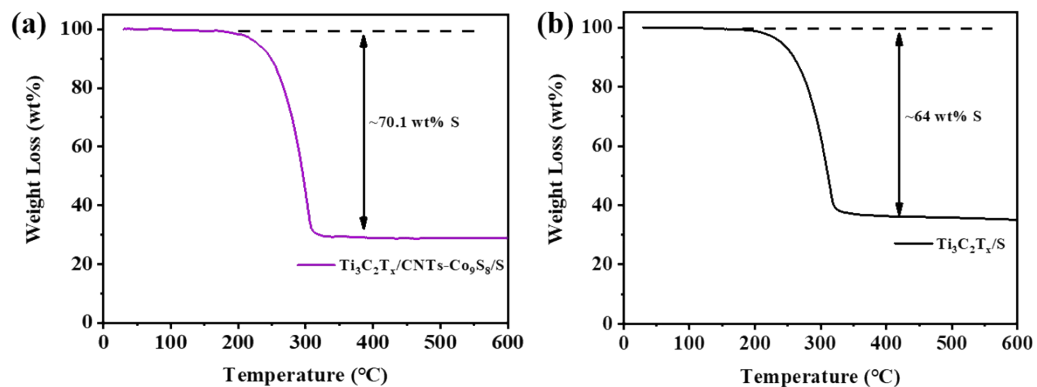

**Figure S2.** TGA curves under the  $\text{N}_2$  atmosphere of (a) the  $\text{Ti}_3\text{C}_2\text{T}_x/\text{CNTs-Co}_9\text{S}_8/\text{S}$  composite and (b) the  $\text{Ti}_3\text{C}_2\text{T}_x/\text{S}$  composite.

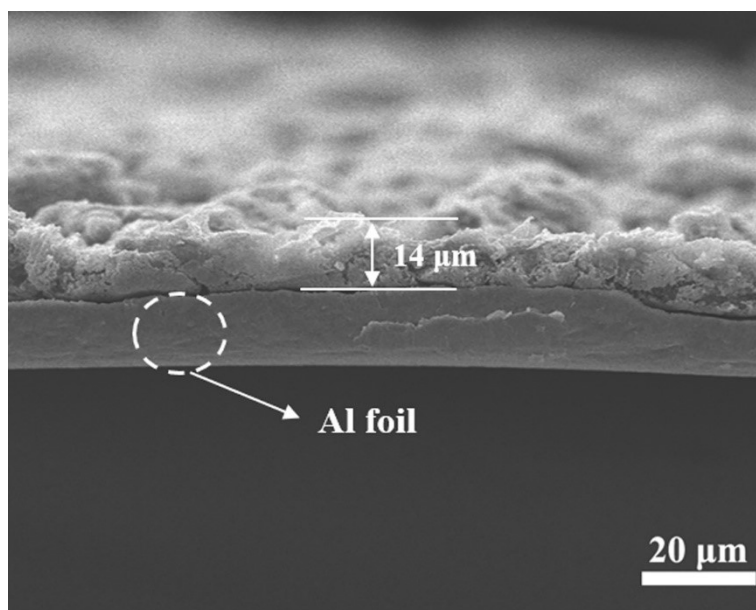

**Figure S3.** The cross-sectional of the  $\text{Ti}_3\text{C}_2\text{T}_x/\text{CNTs-Co}_9\text{S}_8/\text{S}$  cathode.

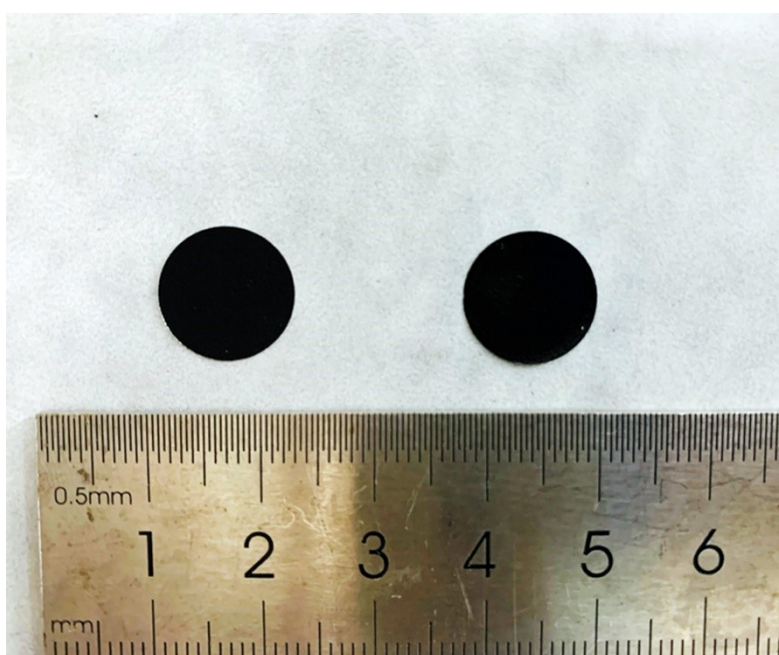

**Figure S4.** The optical pictures of the  $\text{Ti}_3\text{C}_2\text{T}_x/\text{CNTs-Co}_9\text{S}_8/\text{S}$  cathode before (left) and after 200 cycles (right).

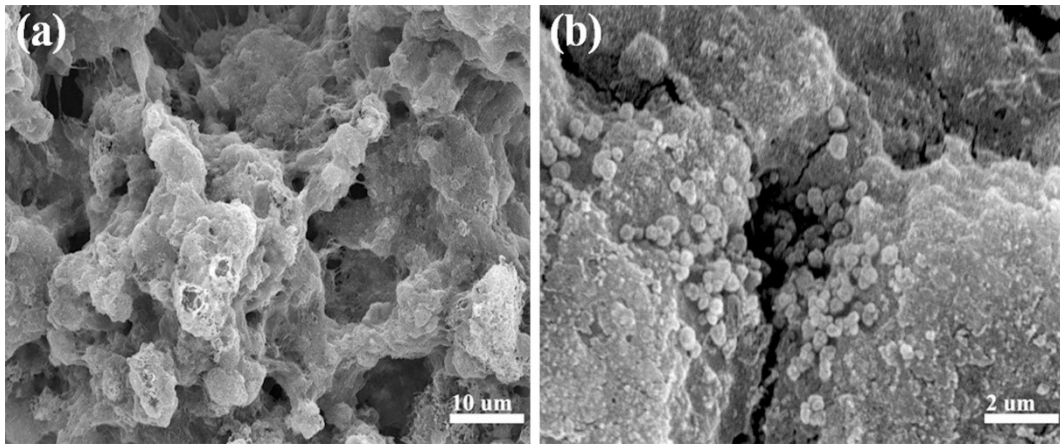

**Figure S5.** (a-b) The post-mortem SEM image of the  $\text{Ti}_3\text{C}_2\text{T}_x/\text{CNTs-Co}_9\text{S}_8/\text{S}$  cathode after 200 cycles. (c) The cross-section SEM image of the  $\text{Ti}_3\text{C}_2\text{T}_x/\text{CNTs-Co}_9\text{S}_8/\text{S}$  cathode.

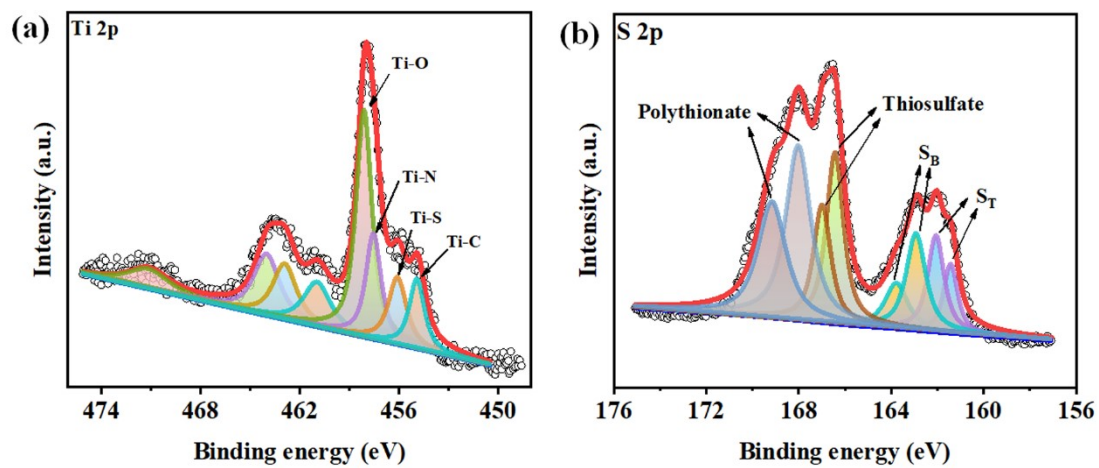

**Figure S6.** The post-mortem XPS spectra of the  $\text{Ti}_3\text{C}_2\text{T}_x/\text{CNTs}-\text{Co}_9\text{S}_8/\text{S}$  cathode after cycling: (a) Ti 2p spectrum and (b) S 2p spectrum.



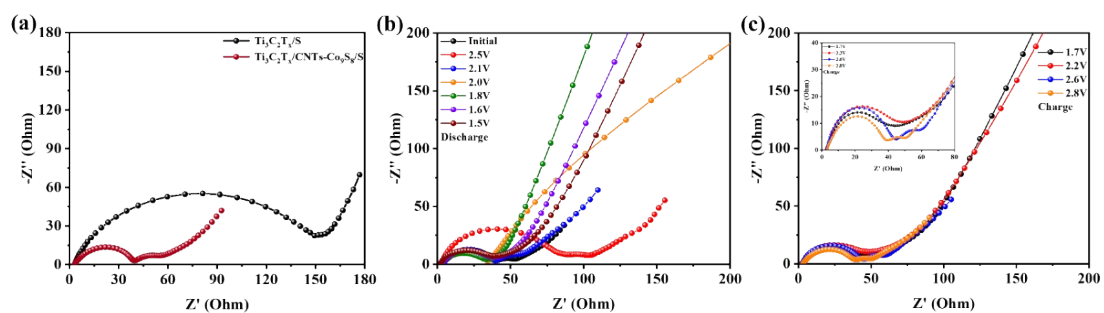

**Figure S7.** (a) EIS spectra of the  $\text{Ti}_3\text{C}_2\text{T}_x/\text{CNTs-Co}_9\text{S}_8/\text{S}$  and  $\text{Ti}_3\text{C}_2\text{T}_x/\text{S}$  cathodes. (b-c) EIS spectra of the  $\text{Ti}_3\text{C}_2\text{T}_x/\text{CNTs-Co}_9\text{S}_8/\text{S}$  cathode at different voltages during the discharging and charging processes.
